# Supplementary material for: A multi-source data integration approach reveals novel associations between metabolites and renal outcomes in the German Chronic Kidney Disease study
Source: Springer Nature journal article supplement (doi:10.1038/s41598-019-50346-2), 2019-09-27
Supplement: MOESM1 [file 41598_2019_50346_MOESM1_ESM.pdf › 41598_2019_50346_MOESM1_ESM.pdf]

Supplementary information for:  
A multi-source data integration approach reveals novel  
associations between metabolites and renal outcomes in the  
German Chronic Kidney Disease study

Michael Altenbuchinger<sup>1,\*</sup>, Helena U. Zacharias<sup>2,\*</sup>, Stefan Solbrig<sup>3</sup>, Andreas Schäfer<sup>3</sup>,  
Mustafa Büyüközkan<sup>2</sup>, Ulla T. Schultheiß<sup>4,5</sup>, Fruzsina Kotsis<sup>4</sup>, Anna Köttgen<sup>4</sup>, Rainer  
Spang<sup>1</sup>, Peter J. Oefner<sup>6</sup>, Jan Krumsiek<sup>2,7</sup>, and Wolfram Gronwald<sup>6, †</sup>

<sup>1</sup>Statistical Bioinformatics, Institute of Functional Genomics, University of Regensburg,  
Am Biopark 9, 93053 Regensburg, Germany.

<sup>2</sup>Institute of Computational Biology, Helmholtz Zentrum München, Ingolstädter  
Landstraße 1, 85764 Neuherberg, Germany.

<sup>3</sup>Department of Physics, University of Regensburg, Universitätsstraße 31, 93053  
Regensburg, Germany.

<sup>4</sup>Institute of Genetic Epidemiology, Department of Biometry, Epidemiology, and  
Medical Bioinformatics, Faculty of Medicine and Medical Center, University of  
Freiburg, 79106 Freiburg, Germany.

<sup>5</sup>Department of Nephrology, Medical Center, University of Freiburg, 79106 Freiburg,  
Germany.

<sup>6</sup>Institute of Functional Genomics, University of Regensburg, Am Biopark 9, 93053  
Regensburg, Germany.

<sup>7</sup>Institute of Computational Biomedicine, Weill Cornell University, New York, NY  
10021, USA.

\*These authors contributed equally to this work.

<sup>†</sup>Correspondence: [Wolfram.Gronwald@klinik.uni-regensburg.de](mailto:Wolfram.Gronwald@klinik.uni-regensburg.de), Tel.:  
+49-941-943-5015

# List of Supplementary Files

|                       |                                                        |
|-----------------------|--------------------------------------------------------|
| Supplementary File 1  | Supplementary Methods, Results, and Figures.           |
| Supplementary File 2  | Exemplary Mixed Graphical Model algorithm Python-code. |
| Supplementary Table 1 | Information on clinical and demographic variables.     |

## 1 Supplementary Methods

### 1.1 NMR spectroscopy: measurement details

Since the presence of broad protein signals might hinder the interpretation of metabolite signals, 1D  $^1\text{H}$  spectra employing a Carr-Purcell-Meiboom-Gill (CPMG) pulse-sequence for the suppression of macromolecular signals were acquired for each EDTA-plasma specimen. For each 1D  $^1\text{H}$  CPMG spectrum, 128 scans were collected into 73728 data points employing presaturation during relaxation for water suppression. Four dummy scans were acquired prior to measurement, the spectral width was 20.02 ppm, the relaxation delay was 4 s and the acquisition time amounted to 3.07 s. The filtering delay amounted to 0.08 s, resulting in a total acquisition time of about 16 min per sample.

### 1.2 NMR data preprocessing

The spectral region from 9.5 - 0.5 ppm was evenly split into 900 bins of 0.01 ppm width using Amix VIEWER 3.9.13 (Bruker BioSpin GmbH, Rheinstetten, Germany). All spectral data were scaled relative to the formic acid signal from 8.5 - 8.45 ppm in order to reduce variations in spectrometer performance. NMR buckets corresponding to the remainders of the suppressed water signal as well as minor contributions from urea (6.0 - 4.5 ppm), formic acid (8.47 - 8.45 ppm), as well as dimethylamine (2.73 - 2.72 ppm) have been excluded prior to data analysis, resulting in a total number of 743 NMR buckets.

### 1.3 Pseudo-log-likelihood, LASSO penalty, and algorithmic implementation

A maximum likelihood estimate (MLE) of Eq. (1) in the main text requires a summation over all discrete states, which is numerically only feasible for small numbers of discrete variables. As an alternative, we use the pseudo-likelihood method of [1], where the negative pseudo log-likelihood is given by

$$\mathcal{L}(\Theta|x, y) = - \sum_{s=1}^p \log p(x_s|x_{\setminus s}, y; \Theta) - \sum_{r=1}^q \log p(y_r|x, y_{\setminus r}; \Theta). \quad (1)$$

Here,  $p(x_s|x_{\setminus s}, y; \Theta)$  is the conditional distribution of a Gaussian variable  $x_s$ , and  $p(y_r|x, y_{\setminus r}, x; \Theta)$  is the conditional distribution of a discrete variable  $y_r$  with  $L_r$  states:

$$\begin{aligned} p(x_s|x_{\setminus s}, y; \Theta) &= \frac{\sqrt{-\beta_{ss}}}{\sqrt{2\pi}} \exp \left( \frac{\beta_{ss}}{2} \left( \frac{\alpha_s + \sum_j \rho_{sj}(y_j) + \sum_{t \neq s} \beta_{st} x_t}{\beta_{ss}} + x_s \right)^2 \right), \\ p(y_r|y_{\setminus r}, x; \Theta) &= \frac{\exp \left( \sum_s \rho_{sr}(y_r) x_s + \frac{1}{2} \phi_{rr}(y_r, y_r) + \sum_{j \neq r} \phi_{rj}(y_r, y_j) \right)}{\sum_{l=1}^{L_r} \exp \left( \sum_s \rho_{sr}(l) x_s + \frac{1}{2} \phi_{rr}(l, l) + \sum_{j \neq r} \phi_{rj}(l, y_j) \right)}. \end{aligned} \quad (2)$$

Note, that the pseudo-log-likelihood method does not require a summation over the whole state space, which makes it computationally more tractable than MLE.

We augmented the negative pseudo-log-likelihood of (1) by a LASSO penalty to calibrate overfitting

$$\lambda \left( \sum_{s=2}^p \sum_{t=1}^{s-1} w_{st} |\beta_{st}| + \sum_{s=1}^p \sum_{j=1}^q w_{sj} \|\rho_{sj}\|_1 + \sum_{j=2}^q \sum_{r=1}^{j-1} w_{rj} \|\phi_{rj}\|_1 \right), \quad (3)$$

where  $\|\cdot\|_1$  is defined as the element-wise matrix norm,

$$\|\phi_{rj}\|_1 = \sum_{l=1}^{L_r} \sum_{m=1}^{L_j} |\phi_{rj}(l, m)| \quad \text{and} \quad \|\rho_j\|_1 = \sum_{l=1}^{L_j} |\rho_j(l)|. \quad (4)$$

The weights  $w_{st}$ ,  $w_{sj}$ , and  $w_{rj}$  were chosen as

$$\begin{aligned} w_{st} &= \sigma_s \sigma_t, & w_{sj} &= \sigma_s \sqrt{\sum_b q_b(1 - q_b)}, \\ w_{rj} &= \sqrt{\sum_a p_a(1 - p_a) \sum_b q_b(1 - q_b)}, \end{aligned} \quad (5)$$

where  $\sigma_s$  is the standard deviation of the continuous variable  $x_s$  and  $p_a = \Pr(y_r = a)$  and  $q_b = \Pr(y_j = b)$  [1]. For the multinomial variables, our parameter space is redundant [1]. This was taken into account by multiplying the penalty factors which correspond to baseline levels by a factor of 10. This forces their couplings to zero.

Optimization problem Eq. (3) is convex [1] and can be efficiently solved by proximal algorithms. We implemented our software in Python, where we used NumPy [2], and the Python package *apppy* accessed under <https://github.com/bodono/apppy>, which performs the proximal gradient descent with Nesterov’s acceleration and adaptive restarts [3].

## 1.4 Calibration of the penalty parameter $\lambda$

We chose the penalty parameter  $\lambda$  according to the Extended Bayesian Information Criterion [4, 5]

$$\text{EBIC}_\gamma(\mathbf{E}) = -2l_n(\hat{\Theta}(\mathbf{E})) + |\mathbf{E}| \log n + 4|\mathbf{E}| \gamma \log P, \quad (6)$$

where  $\gamma$  is a parameter that can be chosen in the interval  $[0, 1]$ ,  $n$  is the number of measurements and  $P$  is the number of variables.  $\mathbf{E}$  is the set of edge parameters unequal to zero, and for  $l_n(\hat{\Theta}(\mathbf{E}))$  we used the corresponding maximized pseudo-log-likelihood. For calculating both  $P$  and  $\mathbf{E}$  we removed the baseline levels from the adjacency matrix. The minimum of Eq. (6) determines the penalty parameter  $\lambda$ , which we estimated by line search. This line search sweeps the  $\lambda$ -sequence  $\lambda_0 \cdot 2^{2, 1.75, 1.5, 1.25, \dots, -4.5, -4.75, -5}$ , with  $\lambda_0 = \sqrt{\frac{\log(p+q)}{n}}$ . Throughout the article, we discuss the model  $\gamma = 1$ , which corresponds to the sparsest model according to EBIC. For visualization, we used the *R* packages *qgraph* [6] and *igraph* [7], where we transformed the edge weights by the formula  $f(x) = \log(1 + 10x)$ .

## 1.5 Association analyses

Analyses were performed using the statistical analysis software *R* version 3.3.3. For logistic regression, we used the *R* package *logistf* [8].

# 2 Supplementary Results

## 2.1 Urinary albumin-to-creatinine ratio

The urinary albumin-to-creatinine ratio (*UACR*) is, besides the glomerular filtration rate (GFR), another important marker of renal function. Supplementary Figure 1a visualizes the first order neighborhood of *UACR*. The MGM trained on the training set connects *UACR* with urinary albumin (*ua*) by a strong positive edge, and with urinary creatinine (*urea*) by a strong negative edge, respectively. This correctly reflects the definition of *UACR*,  $\log_2(UACR) = \log_2(ua/urea) = \log_2(ua) - \log_2(urea)$ .

A third positive edge appears between *ua* and *urea*. This edge can be explained within the conditional dependence framework: two variables are conditionally dependent on each other, if both variables simultaneously change upon holding all other variables fixed. Let the value of *UACR* be fixed and change the value of *ua*. In order to fulfill the requirement that the *UACR* stays fixed, urinary creatinine has

to change accordingly to compensate the changes of urinary albumin and, thus, a positive edge appears between *ua* and *ucrea*.

We further observe positive edges between severe proteinuria (*proteinuria* > 300mg/dL) and *ua* as well as *UACR*, respectively, correctly stating that patients with high urinary levels of albumin and accordingly high *UACR* values are diagnosed with proteinuria. Correspondingly, absent or mild proteinuria (*proteinuria* < 30mg/dL) is negatively associated with urinary albumin and *UACR*. Here, intermediate proteinuria (30mg/dL < *proteinuria* < 300mg/dL) was considered as the baseline.

As shown in Supplementary Figure 1b, the identified neighborhood is almost perfectly predictive of *UACR* on independent test data with a correlation coefficient between true and predicted *UACR* values of *corr*  $\sim$  1.

## 2.2 Alcohol consumption

Alcohol consumption in the GCKD cohort was assessed with a questionnaire about weekly alcohol intake. Study participants, who had stated to consume alcohol not more than twice a week were classified as “little or normal alcohol consumption”, here treated as the baseline level, and all other study participants were classified as “high alcohol consumption”. Supplementary Figure 2a displays the first order neighborhood of “high alcohol consumption”. Interestingly, high alcohol consumption is strongly positively associated with male gender, acute renal failure (*acute\_fail*), high density lipoprotein (*hdl*), an NMR bucket at 1.145 ppm, containing broad lipid signals mainly identified as low density lipoprotein (LDL), two unidentified NMR buckets at 0.835 and 2.755 ppm, and an NMR bucket at 2.675 ppm, identified as citric acid (negatively correlated). Further, it is positively associated with an NMR bucket at 1.925 ppm, identified as acetate (major signal) and minor contributions from arginine and lysine, and an NMR bucket at 3.275 ppm, identified as trimethylamine-N-oxide (TMAO) and minor contributions from D-glucose and betaine.

Levels of large and medium-sized HDL as well as large LDL particles have been reported to be elevated by alcohol consumption [9, 10]. It is also reported that alcohol consumption is generally higher in men than in women [10]. Citric acid has been reported to negatively correlate with alcohol consumption in other studies [11].

As shown in Supplementary Figure 2b, the first order neighborhood of high alcohol consumption is predictive on independent test data with an AUC of 0.796.

### 3 Supplementary Figures

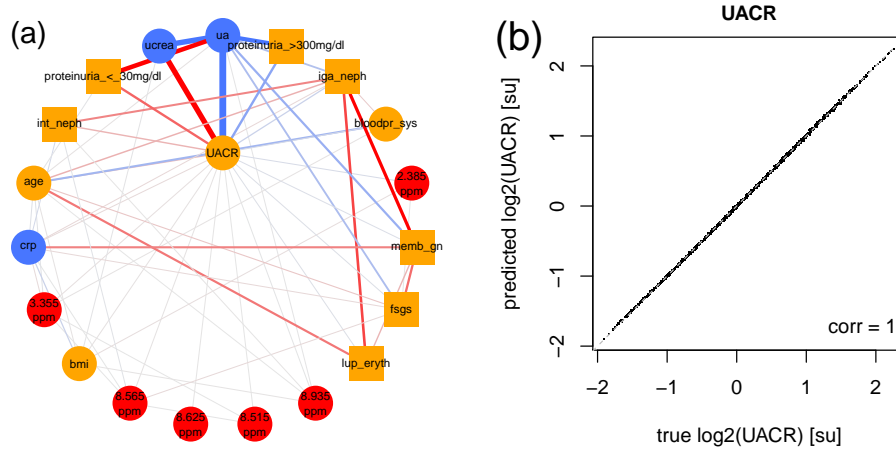

Figure 1: (a) First order neighborhood of urinary albumin-to-creatinine-ratio (*UACR*). *UACR* is positively associated with urinary albumin (*ua*) (edge weight = 22.85) and negatively associated with urinary creatinine (*ucrea*) (edge weight = -7.19), respectively. The positive edge between *ua* and *ucrea* (edge weight = 7.31) can be explained within the conditional dependence framework (see text). Two levels of proteinuria are connected to both *UACR* and *ua*, respectively. High level of protein in the patient's urine (*proteinuria* > 300mg/dL) is positively associated, whereas proteinuria of less than 30mg/dL (*proteinuria* < 30mg/dL) is negatively associated with *UACR* (edge weight = 0.57 and edge weight = -0.56, respectively) and *ua* (edge weight = 2.87 and edge weight = -3.53, respectively), respectively. Moderate proteinuria (30mg/dL < *proteinuria* < 300mg/dL) was considered as the baseline. (b) The diagram shows the predictions of *UACR* on the *y*-axis (in standard units [su]) based on the neighbors of *UACR* on independent test data compared to the true values plotted on the *x*-axis.



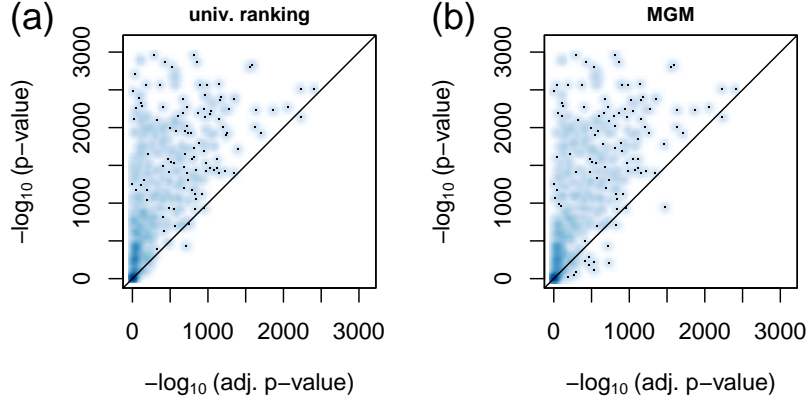

Figure 3: Smooth scatter plot of randomly adjusted  $p$ -values ( $x$ -axis) versus unadjusted (univariate)  $p$ -values ( $y$ -axis) for the univariate screening (a), and the MGM (b) in the training set.

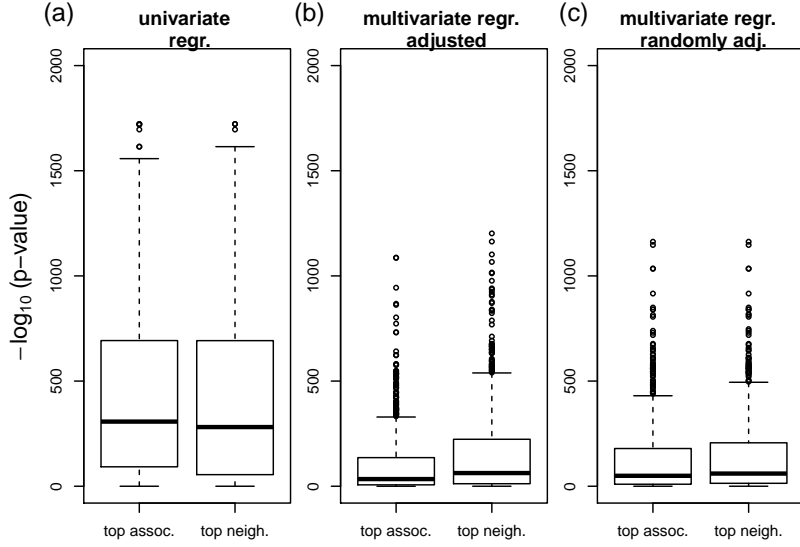

Figure 4: Effects of variable adjustment on univariate or MGM association analysis in the test set. (a) “top assoc.” shows the distribution of  $-\log_{10}(\text{p-values})$  derived from a univariate regression. Here, we calculated  $p$ -values between all possible pairs of variables and collected all top associations. (a) “top neigh.” shows the analogous distribution, where the top feature was selected by largest absolute regression weight in the MGM neighborhood. (b) The corresponding plot, where the  $p$ -values were corrected by the top five confounder variables of the univariate and MGM screening, respectively. (c) The corresponding plot, where we adjusted for the same five randomly selected features for both methods.

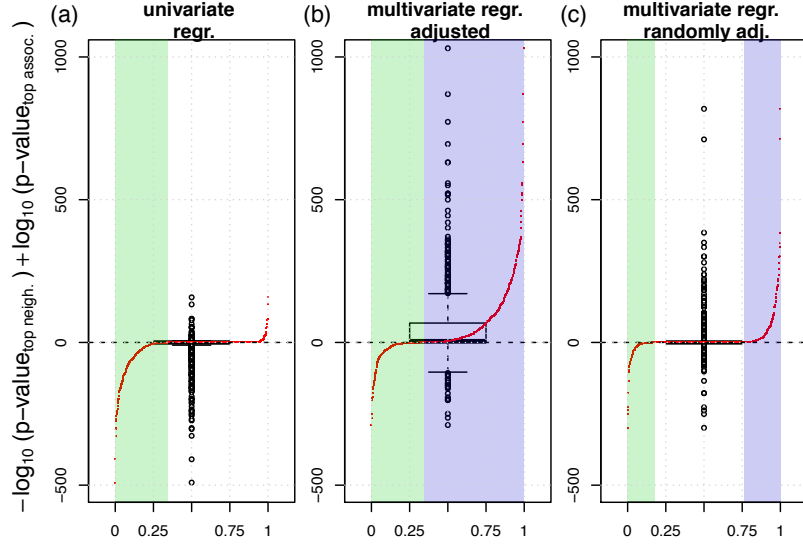

Figure 5: (a) to (c) show the differences between “top neigh.” and “top assoc.” in Figure 4a to c, respectively: (a) shows the  $-\log_{10}(p\text{-values})$  of the MGM approach minus those of the univariate screening in Figure 4a, (b) shows the corresponding plot after adjusting for the respective top confounders, as shown in Figure 4b, and (c) shows the corresponding plot for adjusting for the randomly selected confounders, as shown in Figure 4c. The red points in each figure contrast the values on the  $y$ -axis with their respective rank. On the  $x$ -axis, the highest positive difference corresponds to 1 and the most negative to 0. The green shaded areas correspond to rank percentiles of negative, the violet shaded areas correspond to rank percentiles of positive differences.

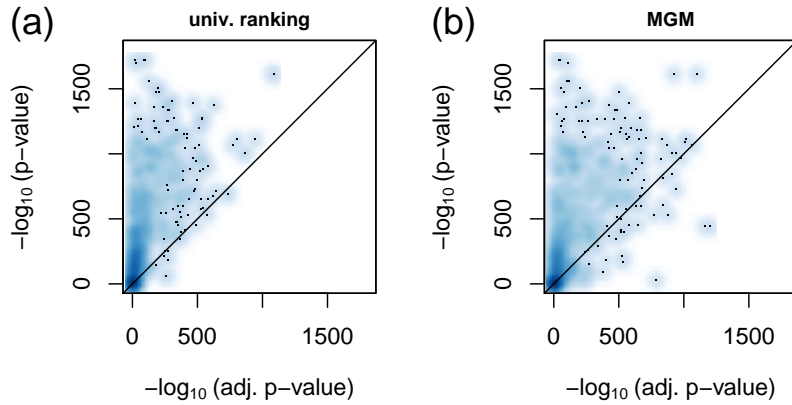

Figure 6: Smooth scatter plot of adjusted  $p$ -values ( $x$ -axis) versus unadjusted (univariate)  $p$ -values ( $y$ -axis) for the univariate screening (a), and the MGM (b) in the test set.



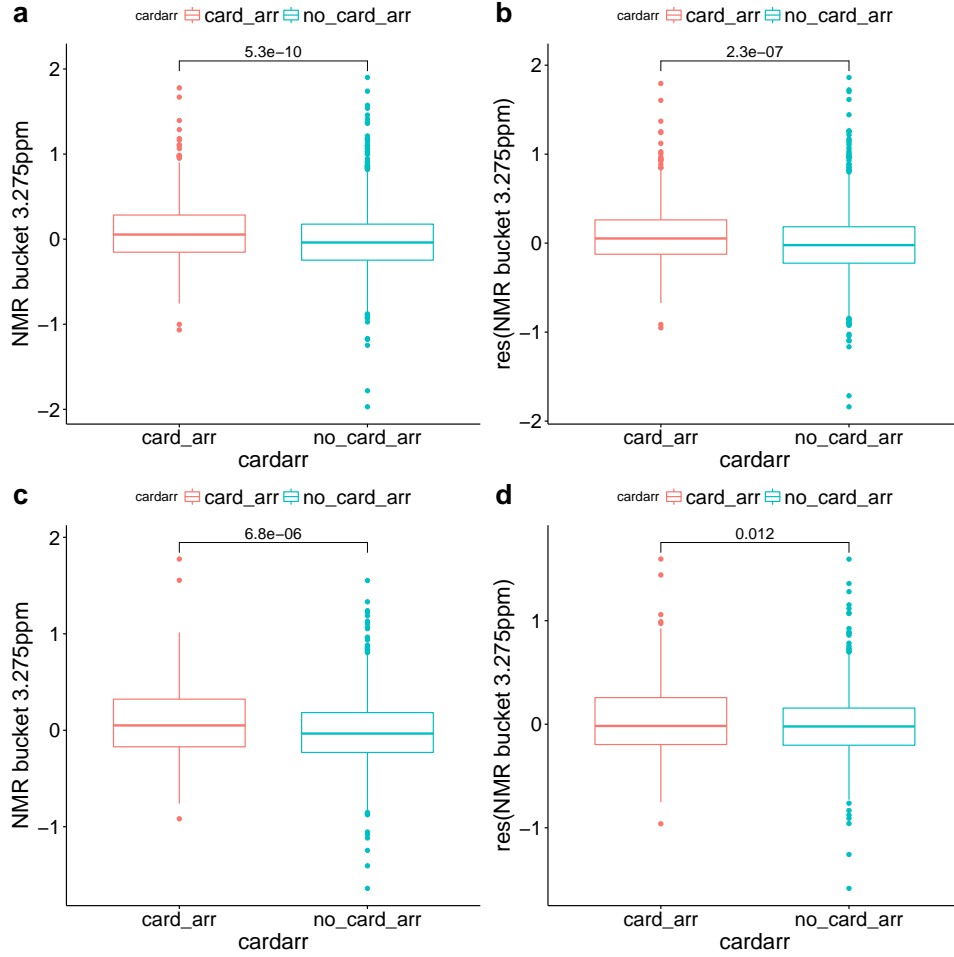

Figure 7: Boxplots comparing NMR signal intensities at 3.275ppm, which comprises NMR signals from trimethylamine-N-oxide (TMAO) (major), as well as minor signals from D-glucose and betaine. Log<sub>2</sub>-transformed NMR signal intensities for patients with (*card\_arr*) and without cardiac arrhythmia (*no\_card\_arr*) for both training (a) and test data (c), respectively, are shown. The residuals of log<sub>2</sub>-transformed NMR signal intensities after adjustment for BMI, systolic blood pressure, smoking status, and diabetes status for both training (b) and test data (d) are shown. *P*-values of corresponding *t*-tests are displayed above the boxes.

## References

- [1] Jason Lee and Trevor Hastie. Structure learning of mixed graphical models. In Carlos M. Carvalho and Pradeep Ravikumar, editors, Proceedings of the Sixteenth International Conference on Artificial Intelligence and Statistics, volume 31 of Proceedings of Machine Learning Research, pages 388–396, Scottsdale, Arizona, USA, 29 Apr–01 May 2013. PMLR.
- [2] Stefan Van Der Walt, S Chris Colbert and Gail Varoquaux. The NumPy array: a structure for efficient numerical computation. Computing in Science & Engineering, 13(2):22, 2011.
- [3] Brendan O’Donoghue and Emmanuel Candes. Adaptive restart for accelerated gradient schemes. Foundations of computational mathematics, 15(3):715–732, 2015.
- [4] Jiahua Chen and Zehua Chen. Extended bayesian information criteria for model selection with large model spaces. Biometrika, 95(3):759–771, 2008.
- [5] Rina Foygel and Mathias Drton. Extended bayesian information criteria for gaussian graphical models. In Advances in neural information processing systems, pages 604–612, 2010.
- [6] Sacha Epskamp, Angélique OJ Cramer, Lourens J Waldorp, Verena D Schmittmann, Denny Borsboom, et al. qgraph: Network visualizations of relationships in psychometric data. Journal of Statistical Software, 48(4):1–18, 2012.
- [7] Gabor Csardi and Tamas Nepusz. The igraph software package for complex network research. InterJournal, Complex Systems:1695, 2006.
- [8] Georg Heinze and Meinhard Ploner. logistf: Firth’s Bias-Reduced Logistic Regression, 2016. R package version 1.22.
- [9] Elizabeth R De Oliveira e Silva, MonnieMcGee Harper, Cynthia E Seidman, Jonathan D Smith, Jan L Breslow, Eliot A Brinton, et al. Alcohol consumption raises hdl cholesterol levels by increasing the transport rate of apolipoproteins ai and a-ii. Circulation, 2000.
- [10] Kenneth J Mukamal, Rachel H Mackey, Lewis H Kuller, Russell P Tracy, Richard A Kronmal, Murray A Mittleman, and David S Siscovick. Alcohol consumption and lipoprotein subclasses in older adults. The Journal of Clinical Endocrinology & Metabolism, 92(7):2559–2566, 2007.
- [11] Peter Würtz, Sarah Cook, Qin Wang, Mika Tiainen, Tuulia Tynkkynen, Antti J Kangas, Pasi Soininen, Jaana Laitinen, Jorma Viikari, Mika Kähönen, et al. Metabolic profiling of alcohol consumption in 9778 young adults. International journal of epidemiology, 45(5):1493–1506, 2016.

## 4 Supplementary Table 1

| variable name                              | alias | assessment                               | type       | category           | mean +/- sd       | unit   | # per category | transformation      |
|--------------------------------------------|-------|------------------------------------------|------------|--------------------|-------------------|--------|----------------|---------------------|
| serum albumin                              | albu  | measured by clinical chemistry at Synlab | continuous | clinical chemistry | 38.38 +/- 4.25    | g/l    | -              | log2-transformation |
| serum C-reactive protein                   | crp   | measured by clinical chemistry at Synlab | continuous | clinical chemistry | 4.50 +/- 7.74     | mg/l   | -              | log2-transformation |
| serum cholesterol                          | chol  | measured by clinical chemistry at Synlab | continuous | clinical chemistry | 211.39 +/- 51.93  | mg/dl  | -              | log2-transformation |
| serum high-density lipoprotein cholesterol | hdl   | measured by clinical chemistry at Synlab | continuous | clinical chemistry | 52.22 +/- 18.11   | mg/dl  | -              | log2-transformation |
| serum low-density lipoprotein cholesterol  | ldl   | measured by clinical chemistry at Synlab | continuous | clinical chemistry | 118.78 +/- 43.12  | mg/dl  | -              | log2-transformation |
| serum triglycerides                        | trig  | measured by clinical chemistry at Synlab | continuous | clinical chemistry | 196.77 +/- 124.84 | mg/dl  | -              | log2-transformation |
| serum creatinine                           | crea  | measured by clinical chemistry at Synlab | continuous | clinical chemistry | 1.51 +/- 0.47     | mg/dl  | -              | log2-transformation |
| serum calcium                              | ca    | measured by clinical chemistry at Synlab | continuous | clinical chemistry | 2.27 +/- 0.15     | mmol/l | -              | log2-transformation |
| serum phosphate                            | pho   | measured by clinical chemistry at Synlab | continuous | clinical chemistry | 1.11 +/- 0.20     | mmol/l | -              | log2-transformation |
| serum cystatin C                           | cysC  | measured by clinical chemistry at Synlab | continuous | clinical chemistry | 1.51 +/- 0.48     | mg/l   | -              | log2-transformation |
| serum urea                                 | urea  | measured by clinical chemistry at Synlab | continuous | clinical chemistry | 28.46 +/- 12.20   | mg/l   | -              | log2-transformation |
| serum uric acid                            | uric  | measured by clinical chemistry at Synlab | continuous | clinical chemistry | 7.20 +/- 1.90     | mg/dl  | -              | log2-transformation |
| serum sodium                               | na    | measured by clinical chemistry at Synlab | continuous | clinical chemistry | 139.68 +/- 3.07   | mmol/l | -              | log2-transformation |

|                                                             |              |                                                                                           |            |                    |                   |                    |   |                     |
|-------------------------------------------------------------|--------------|-------------------------------------------------------------------------------------------|------------|--------------------|-------------------|--------------------|---|---------------------|
| urinary albumin                                             | ua           | measured by clinical chemistry at Synlab                                                  | continuous | clinical chemistry | 309.19 +/- 829.89 | mg/l               | - | log2-transformation |
| urinary creatinine                                          | urea         | measured by clinical chemistry at Synlab                                                  | continuous | clinical chemistry | 81.82 +/- 55.32   | mg/dl              | - | log2-transformation |
| serum hemoglobin                                            | hemo         | measured by Central Lab, University Hospital Erlangen, Germany                            | continuous | clinical chemistry | 13.61 +/- 1.66    | g/dl               | - | log2-transformation |
| glycated serum hemoglobin A1c                               | hba1c        | measured by Central Lab, University Hospital Erlangen, Germany                            | continuous | clinical chemistry | 45.59 +/- 11.15   | mmol/mol           | - | log2-transformation |
| patient age at baseline visit                               | age          | assessed at baseline visit                                                                | continuous | demographic        | 59.87 +/- 12.0    | years              | - | -                   |
| estimated glomerular filtration rate by the CKD-EPI formula | eGFR         | glomerular filtration rate estimated by CKD-EPI equation based on Synlab serum creatinine | continuous | demographic        | 49.56 +/- 18.14   | ml/min per 1.73 m2 | - | log2-transformation |
| urinary albumin to creatinine ratio                         | UACR         | urinary albumin to creatinine ratio based on Synlab measurements                          | continuous | demographic        | 424.18 +/- 952.30 | mg/g               | - | log2-transformation |
| systolic blood pressure                                     | bloodpr_sys  | mean value of up to 3 systolic blood pressure values measured at baseline visit           | continuous | demographic        | 139.46 +/- 20.15  | mmHg               | - | -                   |
| diastolic blood pressure                                    | bloodpr_dias | mean value of up to 3 diastolic blood pressure values measured at baseline visit          | continuous | demographic        | 79.49 +/- 11.73   | mmHg               | - | -                   |
| pulse                                                       | pulse        | measured at baseline visit                                                                | continuous | demographic        | 70.59 +/- 12.11   | bpm                | - | log2-transformation |

|                                                              |             |                                                                                          |             |             |                |       |                               |                                 |
|--------------------------------------------------------------|-------------|------------------------------------------------------------------------------------------|-------------|-------------|----------------|-------|-------------------------------|---------------------------------|
| waist-hip ratio                                              | wh ratio    | quotient of measured waist-circumference to measured hip-circumference at baseline visit | continuous  | demographic | 0.94 +/- 0.09  | -     | -                             | log2-transformation             |
| body mass index                                              | bmi         | measured body mass divided by measured squared body size assessed at baseline visit      | continuous  | demographic | 29.59 +/- 5.83 | kg/m2 | -                             | log2-transformation             |
| ever experienced cardiac infarction                          | card_inf    | assessed at baseline visit                                                               | categorical | demographic | -              | -     | "yes": n=399;<br>"no": n=3306 | "no" was considered as baseline |
| ever underwent cardiac surgery                               | card_surg   | assessed at baseline visit                                                               | categorical | demographic | -              | -     | "yes": n=335;<br>"no": n=3370 | "no" was considered as baseline |
| coronary angioplasty                                         | cor_ves_enl | assessed at baseline visit                                                               | categorical | demographic | -              | -     | "yes": n=511;<br>"no": n=3194 | "no" was considered as baseline |
| ever diagnosed with heart failure                            | card_ins    | assessed at baseline visit                                                               | categorical | demographic | -              | -     | "yes": n=656;<br>"no": n=3049 | "no" was considered as baseline |
| ever diagnosed with any cardiac arrhythmia                   | card_arr    | assessed at baseline visit                                                               | categorical | demographic | -              | -     | "yes": n=725;<br>"no": n=2980 | "no" was considered as baseline |
| ever experienced stroke                                      | stroke      | assessed at baseline visit                                                               | categorical | demographic | -              | -     | "yes": n=279;<br>"no": n=3426 | "no" was considered as baseline |
| ever underwent carotid artery surgery                        | carot_surg  | assessed at baseline visit                                                               | categorical | demographic | -              | -     | "yes": n=69;<br>"no": n=3636  | "no" was considered as baseline |
| ever underwent carotid artery angioplasty or stent placement | carot_enl   | assessed at baseline visit                                                               | categorical | demographic | -              | -     | "yes": n=33;<br>"no": n=3672  | "no" was considered as baseline |
| catheter angiography of peripheral arteries                  | cont_ag     | assessed at baseline visit                                                               | categorical | demographic | -              | -     | "yes": n=147;<br>"no": n=3558 | "no" was considered as baseline |

|                                                                |          |                            |             |             |   |   |                                |                                 |
|----------------------------------------------------------------|----------|----------------------------|-------------|-------------|---|---|--------------------------------|---------------------------------|
| including angioplasty of a peripheral artery                   |          |                            |             |             |   |   |                                |                                 |
| ever underwent surgery to improve blood flow in legs           | leg_surg | assessed at baseline visit | categorical | demographic | - | - | "yes": n=127;<br>"no": n=3578  | "no" was considered as baseline |
| diagnosed with aortic aneurysm                                 | ao_aneu  | assessed at baseline visit | categorical | demographic | - | - | "yes": n=91;<br>"no": n=3614   | "no" was considered as baseline |
| underwent retinal laser therapy due to diabetes                | ret_las  | assessed at baseline visit | categorical | demographic | - | - | "yes": n=279;<br>"no": n=3426  | "no" was considered as baseline |
| underwent amputation                                           | amput    | assessed at baseline visit | categorical | demographic | - | - | "yes": n=121;<br>"no": n=3584  | "no" was considered as baseline |
| ever diagnosed with high blood pressure                        | bl_pres  | assessed at baseline visit | categorical | demographic | - | - | "yes": n=3303;<br>"no": n=402  | "no" was considered as baseline |
| ever diagnosed with elevated blood sugar levels                | bl_sug   | assessed at baseline visit | categorical | demographic | - | - | "yes": n=1362;<br>"no": n=2243 | "no" was considered as baseline |
| ever diagnosed with renal cancer                               | canc_ren | assessed at baseline visit | categorical | demographic | - | - | "yes": n=89;<br>"no": n=3616   | "no" was considered as baseline |
| ever diagnosed with breast cancer                              | canc_br  | assessed at baseline visit | categorical | demographic | - | - | "yes": n=42;<br>"no": n=3663   | "no" was considered as baseline |
| ever diagnosed with cancer affecting female reproductive tract | canc_fem | assessed at baseline visit | categorical | demographic | - | - | "yes": n=45;<br>"no": n=3660   | "no" was considered as baseline |
| ever diagnosed with cancer affecting male reproductive tract   | canc_mal | assessed at baseline visit | categorical | demographic | - | - | "yes": n=79;<br>"no": n=3626   | "no" was considered as baseline |
| ever diagnosed with any other malignoma                        | canc_oth | assessed at baseline visit | categorical | demographic | - | - | "yes": n=164;<br>"no": n=3541  | "no" was considered as baseline |
| ever diagnosed with asthma                                     | asth     | assessed at baseline visit | categorical | demographic | - | - | "yes": n=406;<br>"no": n=3299  | "no" was considered as          |

|                                                           |             |                                             |             |             |   |   |                                                              |                                        |
|-----------------------------------------------------------|-------------|---------------------------------------------|-------------|-------------|---|---|--------------------------------------------------------------|----------------------------------------|
|                                                           |             |                                             |             |             |   |   |                                                              | baseline                               |
| ever diagnosed with chronic obstructive pulmonary disease | copd        | assessed at baseline visit                  | categorical | demographic | - | - | "yes": n=232;<br>"no": n=3473                                | "no" was considered as baseline        |
| ever diagnosed with a gout attack                         | gout        | assessed at baseline visit                  | categorical | demographic | - | - | "yes": n=872;<br>"no": n=2833                                | "no" was considered as baseline        |
| intake of prescription medication                         | drug        | assessed at baseline visit                  | categorical | demographic | - | - | "yes": n=3666;<br>"no": n=39                                 | "no" was considered as baseline        |
| intake of over the counter medication                     | hom_drug    | assessed at baseline visit                  | categorical | demographic | - | - | "yes": n=1414;<br>"no": n=2291                               | "no" was considered as baseline        |
| intake of pain killers                                    | pain_kil    | assessed at baseline visit                  | categorical | demographic | - | - | "never": n=1535;<br>"sometimes":n=1864;<br>"regularly":n=306 | "regularly" was considered as baseline |
| ever underwent temporary dialysis                         | temp_dial   | assessed at baseline visit                  | categorical | demographic | - | - | "yes": n=165;<br>"no": n=3540                                | "no" was considered as baseline        |
| experienced angina pectoris                               | br_pain     | assessed at baseline visit                  | categorical | demographic | - | - | "yes": n=1235;<br>"no": n=2470                               | "no" was considered as baseline        |
| ever experienced nocturnal dyspnea                        | dyspn       | assessed at baseline visit                  | categorical | demographic | - | - | "yes": n=454;<br>"no": n=3251                                | "no" was considered as baseline        |
| use of extra pillows at night due to dyspnea              | dyspn_cus   | assessed at baseline visit                  | categorical | demographic | - | - | "yes": n=455;<br>"no": n=3250                                | "no" was considered as baseline        |
| ever experienced dyspnea during physical strain           | dyspn_str   | assessed at baseline visit                  | categorical | demographic | - | - | "yes": n=1494;<br>"no": n=2211                               | "no" was considered as baseline        |
| regular coughing with sputum                              | dyspn_cough | assessed at baseline visit                  | categorical | demographic | - | - | "yes": n=534;<br>"no": n=3171                                | "no" was considered as baseline        |
| renal disease due to type-1 diabetes mellitus             | dm_typ1     | telephone interview with treating physician | categorical | demographic | - | - | "yes": n=78;<br>"no": n=3627                                 | "no" was considered as baseline        |
| renal disease due to type-2 diabetes                      | dm_typ2     | telephone interview with                    | categorical | demographic | - | - | "yes": n=898;<br>"no": n=2807                                | "no" was considered as                 |



|                                                         |             |                                             |             |             |   |   |                               |                                 |
|---------------------------------------------------------|-------------|---------------------------------------------|-------------|-------------|---|---|-------------------------------|---------------------------------|
| mellitus                                                |             | treating physician                          |             |             |   |   |                               | baseline                        |
| renal disease due to renal arterial stenosis            | ren_artsten | telephone interview with treating physician | categorical | demographic | - | - | "yes": n=77;<br>"no": n=3628  | "no" was considered as baseline |
| renal disease due to Wegener's granulomatosis           | morb_weg    | telephone interview with treating physician | categorical | demographic | - | - | "yes": n=89;<br>"no": n=3616  | "no" was considered as baseline |
| renal disease due to microscopic polyangiitis           | mic_polyang | telephone interview with treating physician | categorical | demographic | - | - | "yes": n=43;<br>"no": n=3662  | "no" was considered as baseline |
| renal disease due to systemic lupus erythematoses       | lup_eryth   | telephone interview with treating physician | categorical | demographic | - | - | "yes": n=95;<br>"no": n=3610  | "no" was considered as baseline |
| renal disease due to IgA-nephropathy                    | iga_neph    | telephone interview with treating physician | categorical | demographic | - | - | "yes": n=336;<br>"no": n=3369 | "no" was considered as baseline |
| renal disease due to focal segmental glomerulosclerosis | fsgs        | telephone interview with treating physician | categorical | demographic | - | - | "yes": n=159;<br>"no": n=3546 | "no" was considered as baseline |
| renal disease due to minimal change glomerulopathy      | min_chan    | telephone interview with treating physician | categorical | demographic | - | - | "yes": n=48;<br>"no": n=3657  | "no" was considered as baseline |
| renal disease due to membranous glomerulonephritis      | memb_gn     | telephone interview with treating physician | categorical | demographic | - | - | "yes": n=122;<br>"no": n=3583 | "no" was considered as baseline |
| renal disease due to interstitial nephropathy           | int_neph    | telephone interview with treating physician | categorical | demographic | - | - | "yes": n=177;<br>"no": n=3528 | "no" was considered as baseline |
| renal disease due to analgesic nephropathy              | an_neph     | telephone interview with treating physician | categorical | demographic | - | - | "yes": n=109;<br>"no": n=3596 | "no" was considered as baseline |
| renal disease due to nephrectomy due to tumour          | tum_nephr   | telephone interview with treating physician | categorical | demographic | - | - | "yes": n=104;<br>"no": n=3601 | "no" was considered as baseline |
| renal disease due to nephrectomy due to other reasons   | oth_nephr   | telephone interview with treating physician | categorical | demographic | - | - | "yes": n=70;<br>"no": n=3635  | "no" was considered as baseline |
| renal disease due to autosomal                          | adpkd       | telephone interview with                    | categorical | demographic | - | - | "yes": n=151;<br>"no": n=3554 | "no" was considered as          |

|                                                              |            |                                             |             |                |   |   |                                |                                 |
|--------------------------------------------------------------|------------|---------------------------------------------|-------------|----------------|---|---|--------------------------------|---------------------------------|
| dominant polycystic kidney disease                           |            | treating physician                          |             |                |   |   |                                | baseline                        |
| renal disease due to kidney stones                           | kid_stones | telephone interview with treating physician | categorical | demographic    | - | - | "yes": n=105;<br>"no": n=3600  | "no" was considered as baseline |
| renal disease due to recurrent inflammation                  | rec_inf    | telephone interview with treating physician | categorical | demographic    | - | - | "yes": n=84;<br>"no": n=3621   | "no" was considered as baseline |
| renal disease due to vesicoureteral reflux                   | ves_refl   | telephone interview with treating physician | categorical | demographic    | - | - | "yes": n=43;<br>"no": n=3662   | "no" was considered as baseline |
| renal disease due to vascular nephropathy                    | vasc_neph  | telephone interview with treating physician | categorical | demographic    | - | - | "yes": n=1519;<br>"no": n=2186 | "no" was considered as baseline |
| diagnosed with aortic valve stenosis                         | ao_sten    | telephone interview with treating physician | categorical | demographic    | - | - | "yes": n=53;<br>"no": n=3652   | "no" was considered as baseline |
| diagnosed with aortic valve insufficiency                    | ao_ins     | telephone interview with treating physician | categorical | demographic    | - | - | "yes": n=102;<br>"no": n=3603  | "no" was considered as baseline |
| diagnosed with mitral valve insufficiency                    | mit_ins    | telephone interview with treating physician | categorical | demographic    | - | - | "yes": n=182;<br>"no": n=3523  | "no" was considered as baseline |
| diagnosed with other heart valve anomalies                   | oth_ins    | telephone interview with treating physician | categorical | demographic    | - | - | "yes": n=128;<br>"no": n=3577  | "no" was considered as baseline |
| receives double renin-angiotensin system blockage medication | med_do_ras | aggregated baseline medication              | categorical | drug treatment | - | - | "yes": n=290;<br>"no": n=3415  | "no" was considered as baseline |
| receives single renin-angiotensin system blockage medication | med_si_ras | aggregated baseline medication              | categorical | drug treatment | - | - | "yes": n=2630;<br>"no": n=1075 | "no" was considered as baseline |
| receives blood-pressure altering medication                  | med_bp     | aggregated baseline medication              | categorical | drug treatment | - | - | "yes": n=3406;<br>"no": n=299  | "no" was considered as baseline |
| receives angiotensin                                         | med_bp_ace | aggregated baseline                         | categorical | drug treatment | - | - | "yes": n=1750;<br>"no": n=1955 | "no" was considered as          |

|                                                              |                     |                                |             |                |   |   |                                |                                 |
|--------------------------------------------------------------|---------------------|--------------------------------|-------------|----------------|---|---|--------------------------------|---------------------------------|
| converting enzyme inhibitor                                  |                     | medication                     |             |                |   |   |                                | baseline                        |
| receives angiotensin II receptor blockers (arb)              | med_bp_arb          | aggregated baseline medication | categorical | drug treatment | - | - | "yes": n=1460;<br>"no": n=2245 | "no" was considered as baseline |
| receives diuretics                                           | med_diuret          | aggregated baseline medication | categorical | drug treatment | - | - | "yes": n=2183;<br>"no": n=1522 | "no" was considered as baseline |
| receives potassium-sparing diuretics                         | med_diuret_pot_sp   | aggregated baseline medication | categorical | drug treatment | - | - | "yes": n=340;<br>"no": n=3365  | "no" was considered as baseline |
| receives thiazide diuretics                                  | med_diuret_thiazid  | aggregated baseline medication | categorical | drug treatment | - | - | "yes": n=1105;<br>"no": n=2600 | "no" was considered as baseline |
| receives aldosterone antagonists                             | med_diuret_aldoanta | aggregated baseline medication | categorical | drug treatment | - | - | "yes": n=287;<br>"no": n=3418  | "no" was considered as baseline |
| receives loop diuretics                                      | med_diuret_loop     | aggregated baseline medication | categorical | drug treatment | - | - | "yes": n=1381;<br>"no": n=2324 | "no" was considered as baseline |
| receives calcium channel blockers controlling blood pressure | med_bpcalciumanta   | aggregated baseline medication | categorical | drug treatment | - | - | "yes": n=1349;<br>"no": n=2356 | "no" was considered as baseline |
| receives beta blockers controlling blood pressure            | med_bpbetablock     | aggregated baseline medication | categorical | drug treatment | - | - | "yes": n=2001;<br>"no": n=1704 | "no" was considered as baseline |
| receives central alpha receptor blockers                     | med_alpha_central   | aggregated baseline medication | categorical | drug treatment | - | - | "yes": n=430;<br>"no": n=3275  | "no" was considered as baseline |
| receives peripheral alpha receptor blockers                  | med_alpha_peripher  | aggregated baseline medication | categorical | drug treatment | - | - | "yes": n=229;<br>"no": n=3476  | "no" was considered as baseline |
| receives drugs against diabetes mellitus                     | med_dm              | aggregated baseline medication | categorical | drug treatment | - | - | "yes": n=995;<br>"no": n=2710  | "no" was considered as baseline |
| receives oral anti-diabetic drugs                            | med_dm_oral         | aggregated baseline            | categorical | drug treatment | - | - | "yes": n=540;<br>"no": n=3165  | "no" was considered as          |

|                                                                              |                  |                                |             |                |   |   |                                |                                 |
|------------------------------------------------------------------------------|------------------|--------------------------------|-------------|----------------|---|---|--------------------------------|---------------------------------|
|                                                                              |                  | medication                     |             |                |   |   |                                | baseline                        |
| receives insulin                                                             | med_dm_insulin   | aggregated baseline medication | categorical | drug treatment | - | - | "yes": n=612;<br>"no": n=3093  | "no" was considered as baseline |
| receives metformin                                                           | med_metformin    | aggregated baseline medication | categorical | drug treatment | - | - | "yes": n=241;<br>"no": n=3464  | "no" was considered as baseline |
| receives sulfonylureas                                                       | med_sulfonylhist | aggregated baseline medication | categorical | drug treatment | - | - | "yes": n=176;<br>"no": n=3529  | "no" was considered as baseline |
| receives glinides to treat type-2 diabetes mellitus                          | med_glinide      | aggregated baseline medication | categorical | drug treatment | - | - | "yes": n=89;<br>"no": n=3616   | "no" was considered as baseline |
| receives dipeptidyl peptidase-4 (dpp4) drugs                                 | med_dpp4         | aggregated baseline medication | categorical | drug treatment | - | - | "yes": n=131;<br>"no": n=3574  | "no" was considered as baseline |
| receives drugs due to psychological disorders                                | med_psych1       | aggregated baseline medication | categorical | drug treatment | - | - | "yes": n=462;<br>"no": n=3243  | "no" was considered as baseline |
| receives drugs due to psychological disorders in combination with analgetics | med_psych2       | aggregated baseline medication | categorical | drug treatment | - | - | "yes": n=892;<br>"no": n=2813  | "no" was considered as baseline |
| receives antidepressants                                                     | med_antidepr     | aggregated baseline medication | categorical | drug treatment | - | - | "yes": n=328;<br>"no": n=3377  | "no" was considered as baseline |
| receives analgetics                                                          | med_alg          | aggregated baseline medication | categorical | drug treatment | - | - | "yes": n=579;<br>"no": n=3126  | "no" was considered as baseline |
| receives anti-dementia drugs                                                 | med_antidemenz   | aggregated baseline medication | categorical | drug treatment | - | - | "yes": n=51;<br>"no": n=3654   | "no" was considered as baseline |
| receives lipid lowering drugs                                                | med_lip_low      | aggregated baseline medication | categorical | drug treatment | - | - | "yes": n=1867;<br>"no": n=1838 | "no" was considered as baseline |
| receives statins                                                             | med_statins      | aggregated baseline medication | categorical | drug treatment | - | - | "yes": n=1737;<br>"no": n=1968 | "no" was considered as baseline |
| receives fibrates                                                            | med_fibrates     | aggregated                     | categorical | drug treatment | - | - | "yes": n=68;                   | "no" was                        |

|                                      |                    |                                |             |                |   |   |                                |                                 |
|--------------------------------------|--------------------|--------------------------------|-------------|----------------|---|---|--------------------------------|---------------------------------|
|                                      |                    | baseline medication            |             |                |   |   | "no": n=3637                   | considered as baseline          |
| receives cholesterol lowering drugs  | med_chol_low       | aggregated baseline medication | categorical | drug treatment | - | - | "yes": n=1763;<br>"no": n=1942 | "no" was considered as baseline |
| receives triglyceride lowering drugs | med_tg_low         | aggregated baseline medication | categorical | drug treatment | - | - | "yes": n=172;<br>"no": n=3533  | "no" was considered as baseline |
| receives anti-anemic drugs           | med_antianem       | aggregated baseline medication | categorical | drug treatment | - | - | "yes": n=300;<br>"no": n=3405  | "no" was considered as baseline |
| receives iron-containing drugs       | med_fer            | aggregated baseline medication | categorical | drug treatment | - | - | "yes": n=160;<br>"no": n=3545  | "no" was considered as baseline |
| receives vitamin B 12                | med_vit12          | aggregated baseline medication | categorical | drug treatment | - | - | "yes": n=42;<br>"no": n=3663   | "no" was considered as baseline |
| receives folic acid                  | med_fol            | aggregated baseline medication | categorical | drug treatment | - | - | "yes": n=69;<br>"no": n=3636   | "no" was considered as baseline |
| receives calcium                     | med_calc           | aggregated baseline medication | categorical | drug treatment | - | - | "yes": n=440;<br>"no": n=3265  | "no" was considered as baseline |
| receives vitamin D                   | med_vitD           | aggregated baseline medication | categorical | drug treatment | - | - | "yes": n=1126;<br>"no": n=2579 | "no" was considered as baseline |
| receives bisphosphonate              | med_bisphosphonate | aggregated baseline medication | categorical | drug treatment | - | - | "yes": n=64;<br>"no": n=3641   | "no" was considered as baseline |
| receives anti-osteoporosis drugs     | med_osteopor       | aggregated baseline medication | categorical | drug treatment | - | - | "yes": n=73;<br>"no": n=3632   | "no" was considered as baseline |
| receives dual antiplatelet therapy   | med_dual_antipl    | aggregated baseline medication | categorical | drug treatment | - | - | "yes": n=73;<br>"no": n=3632   | "no" was considered as baseline |
| receives anti thrombotic drugs       | med_antipl         | aggregated baseline medication | categorical | drug treatment | - | - | "yes": n=1588;<br>"no": n=2117 | "no" was considered as baseline |
| receives vitamin K antagonists       | med_vitK_ant       | aggregated baseline            | categorical | drug treatment | - | - | "yes": n=385;<br>"no": n=3320  | "no" was considered as          |

|                                                |                |                                                                                                                            |             |                |   |   |                                                                                |                                                             |
|------------------------------------------------|----------------|----------------------------------------------------------------------------------------------------------------------------|-------------|----------------|---|---|--------------------------------------------------------------------------------|-------------------------------------------------------------|
|                                                |                | medication                                                                                                                 |             |                |   |   |                                                                                | baseline                                                    |
| receives heparin                               | met_heparin    | aggregated baseline medication                                                                                             | categorical | drug treatment | - | - | "yes": n=38;<br>"no": n=3667                                                   | "no" was considered as baseline                             |
| receives antiplatelet therapy                  | med_antipl_agg | aggregated baseline medication                                                                                             | categorical | drug treatment | - | - | "yes": n=1235;<br>"no": n=2470                                                 | "no" was considered as baseline                             |
| receives clopidogrel                           | med_clopido    | aggregated baseline medication                                                                                             | categorical | drug treatment | - | - | "yes": n=141;<br>"no": n=3564                                                  | "no" was considered as baseline                             |
| receives acetylsalicylic acid (asa)            | med_asa        | aggregated baseline medication                                                                                             | categorical | drug treatment | - | - | "yes": n=1198;<br>"no": n=2507                                                 | "no" was considered as baseline                             |
| patient smoking status                         | smoking        | self-reported smoking status                                                                                               | categorical | demographic    | - | - | "former smoker": n=1603; "non-smoker": n=1502;<br>"smoker": n=600              | "non-smoker" was considered as baseline                     |
| patient proteinuria categories                 | proteinuria    | aggregated baseline data                                                                                                   | categorical | demographic    | - | - | "<30mg/dl": n=1786;<br>"30-300(incl.)mg/dl": n=851,<br>">300mg/dl": n=1068     | "30-300(incl.)mg/dl" was considered as baseline             |
| patient gender                                 | gender         | aggregated baseline data                                                                                                   | categorical | demographic    | - | - | "male": n=2243;<br>"female": n=1462                                            | "female" was considered as baseline                         |
| patient alcohol intake                         | alcohol        | self-reported weekly alcohol intake                                                                                        | categorical | demographic    | - | - | "high alcohol consumption": n=722;<br>"low/normal alcohol consumption": n=2983 | "low/normal alcohol consumption" was considered as baseline |
| leading CKD disease cause diabetic nephropathy | diab_neph      | aggregated baseline data, diagnosed if physician reported type-1 or type-2 diabetes mellitus or other diabetic nephropathy | categorical | demographic    | - | - | "yes": n=980;<br>"no": n=2725                                                  | "no" was considered as baseline                             |
| leading CKD                                    | single_kidney  | aggregated                                                                                                                 | categorical | demographic    | - | - | "yes": n=225;                                                                  | "no" was                                                    |

|                                                             |              |                                                                                                                                                                                                                                                   |             |             |   |   |                                |                                       |
|-------------------------------------------------------------|--------------|---------------------------------------------------------------------------------------------------------------------------------------------------------------------------------------------------------------------------------------------------|-------------|-------------|---|---|--------------------------------|---------------------------------------|
| disease cause<br>single kidney                              |              | baseline data,<br>diagnosed if<br>treating physician<br>reported tumour<br>nephrectomy,<br>living kidney<br>donor, aggregated<br>baseline data,<br>nephrectomy due<br>to other reasons,<br>renal agenesis or<br>other reason for<br>single kidney |             |             |   |   | "no": n=3480                   | considered as<br>baseline             |
| leading CKD<br>disease cause<br>hypertensive<br>nephropathy | hyp_neph     | aggregated<br>baseline data,<br>diagnosed if<br>physician<br>reported renal<br>artery stenosis,<br>nephrosclerosis,<br>renal infarction,<br>or other vascular<br>nephropathy                                                                      | categorical | demographic | - | - | "yes": n=1519;<br>"no": n=2186 | "no" was<br>considered as<br>baseline |
| leading CKD<br>disease cause<br>acute renal<br>failures     | acute_fail   | aggregated<br>baseline data,<br>diagnosed if<br>physician<br>reported post-<br>ischemic, septic,<br>or toxic acute<br>renal failure                                                                                                               | categorical | demographic | - | - | "yes": n=174;<br>"no": n=3531  | "no" was<br>considered as<br>baseline |
| positive disease<br>history of diabetes<br>mellitus         | diabetic     | aggregated<br>baseline data,<br>diagnosed if<br>physician<br>reported HbA1c<br>>= 6.5% or patient<br>receives at least<br>one drug<br>classified as 'A10'                                                                                         | categorical | demographic | - | - | "yes": n=1280;<br>"no": n=2425 | "no" was<br>considered as<br>baseline |
| positive disease                                            | hypertension | aggregated                                                                                                                                                                                                                                        | categorical | demographic | - | - | "yes": n=3558;                 | "no" was                              |

|                          |  |                                                                                                                                                                                                                         |  |  |  |  |  |             |                        |
|--------------------------|--|-------------------------------------------------------------------------------------------------------------------------------------------------------------------------------------------------------------------------|--|--|--|--|--|-------------|------------------------|
| history for hypertension |  | baseline data, diagnosed if patient has mean systolic blood pressure $\geq 140$ mmHg, or mean diastolic blood pressure $\geq 90$ mmHg, or receives at least one drug classified as 'C02', 'C03', 'C07', 'C08', or 'C09' |  |  |  |  |  | "no": n=147 | considered as baseline |
|--------------------------|--|-------------------------------------------------------------------------------------------------------------------------------------------------------------------------------------------------------------------------|--|--|--|--|--|-------------|------------------------|
